# Supplementary figures and images for: Auditing the Representation of Female Versus Male Athletes in Sports Science and Sports Medicine Research: Evidence-Based Performance Supplements
Source: MDPI journal article supplement (doi:10.3390/nu14050953), 2022-02-23

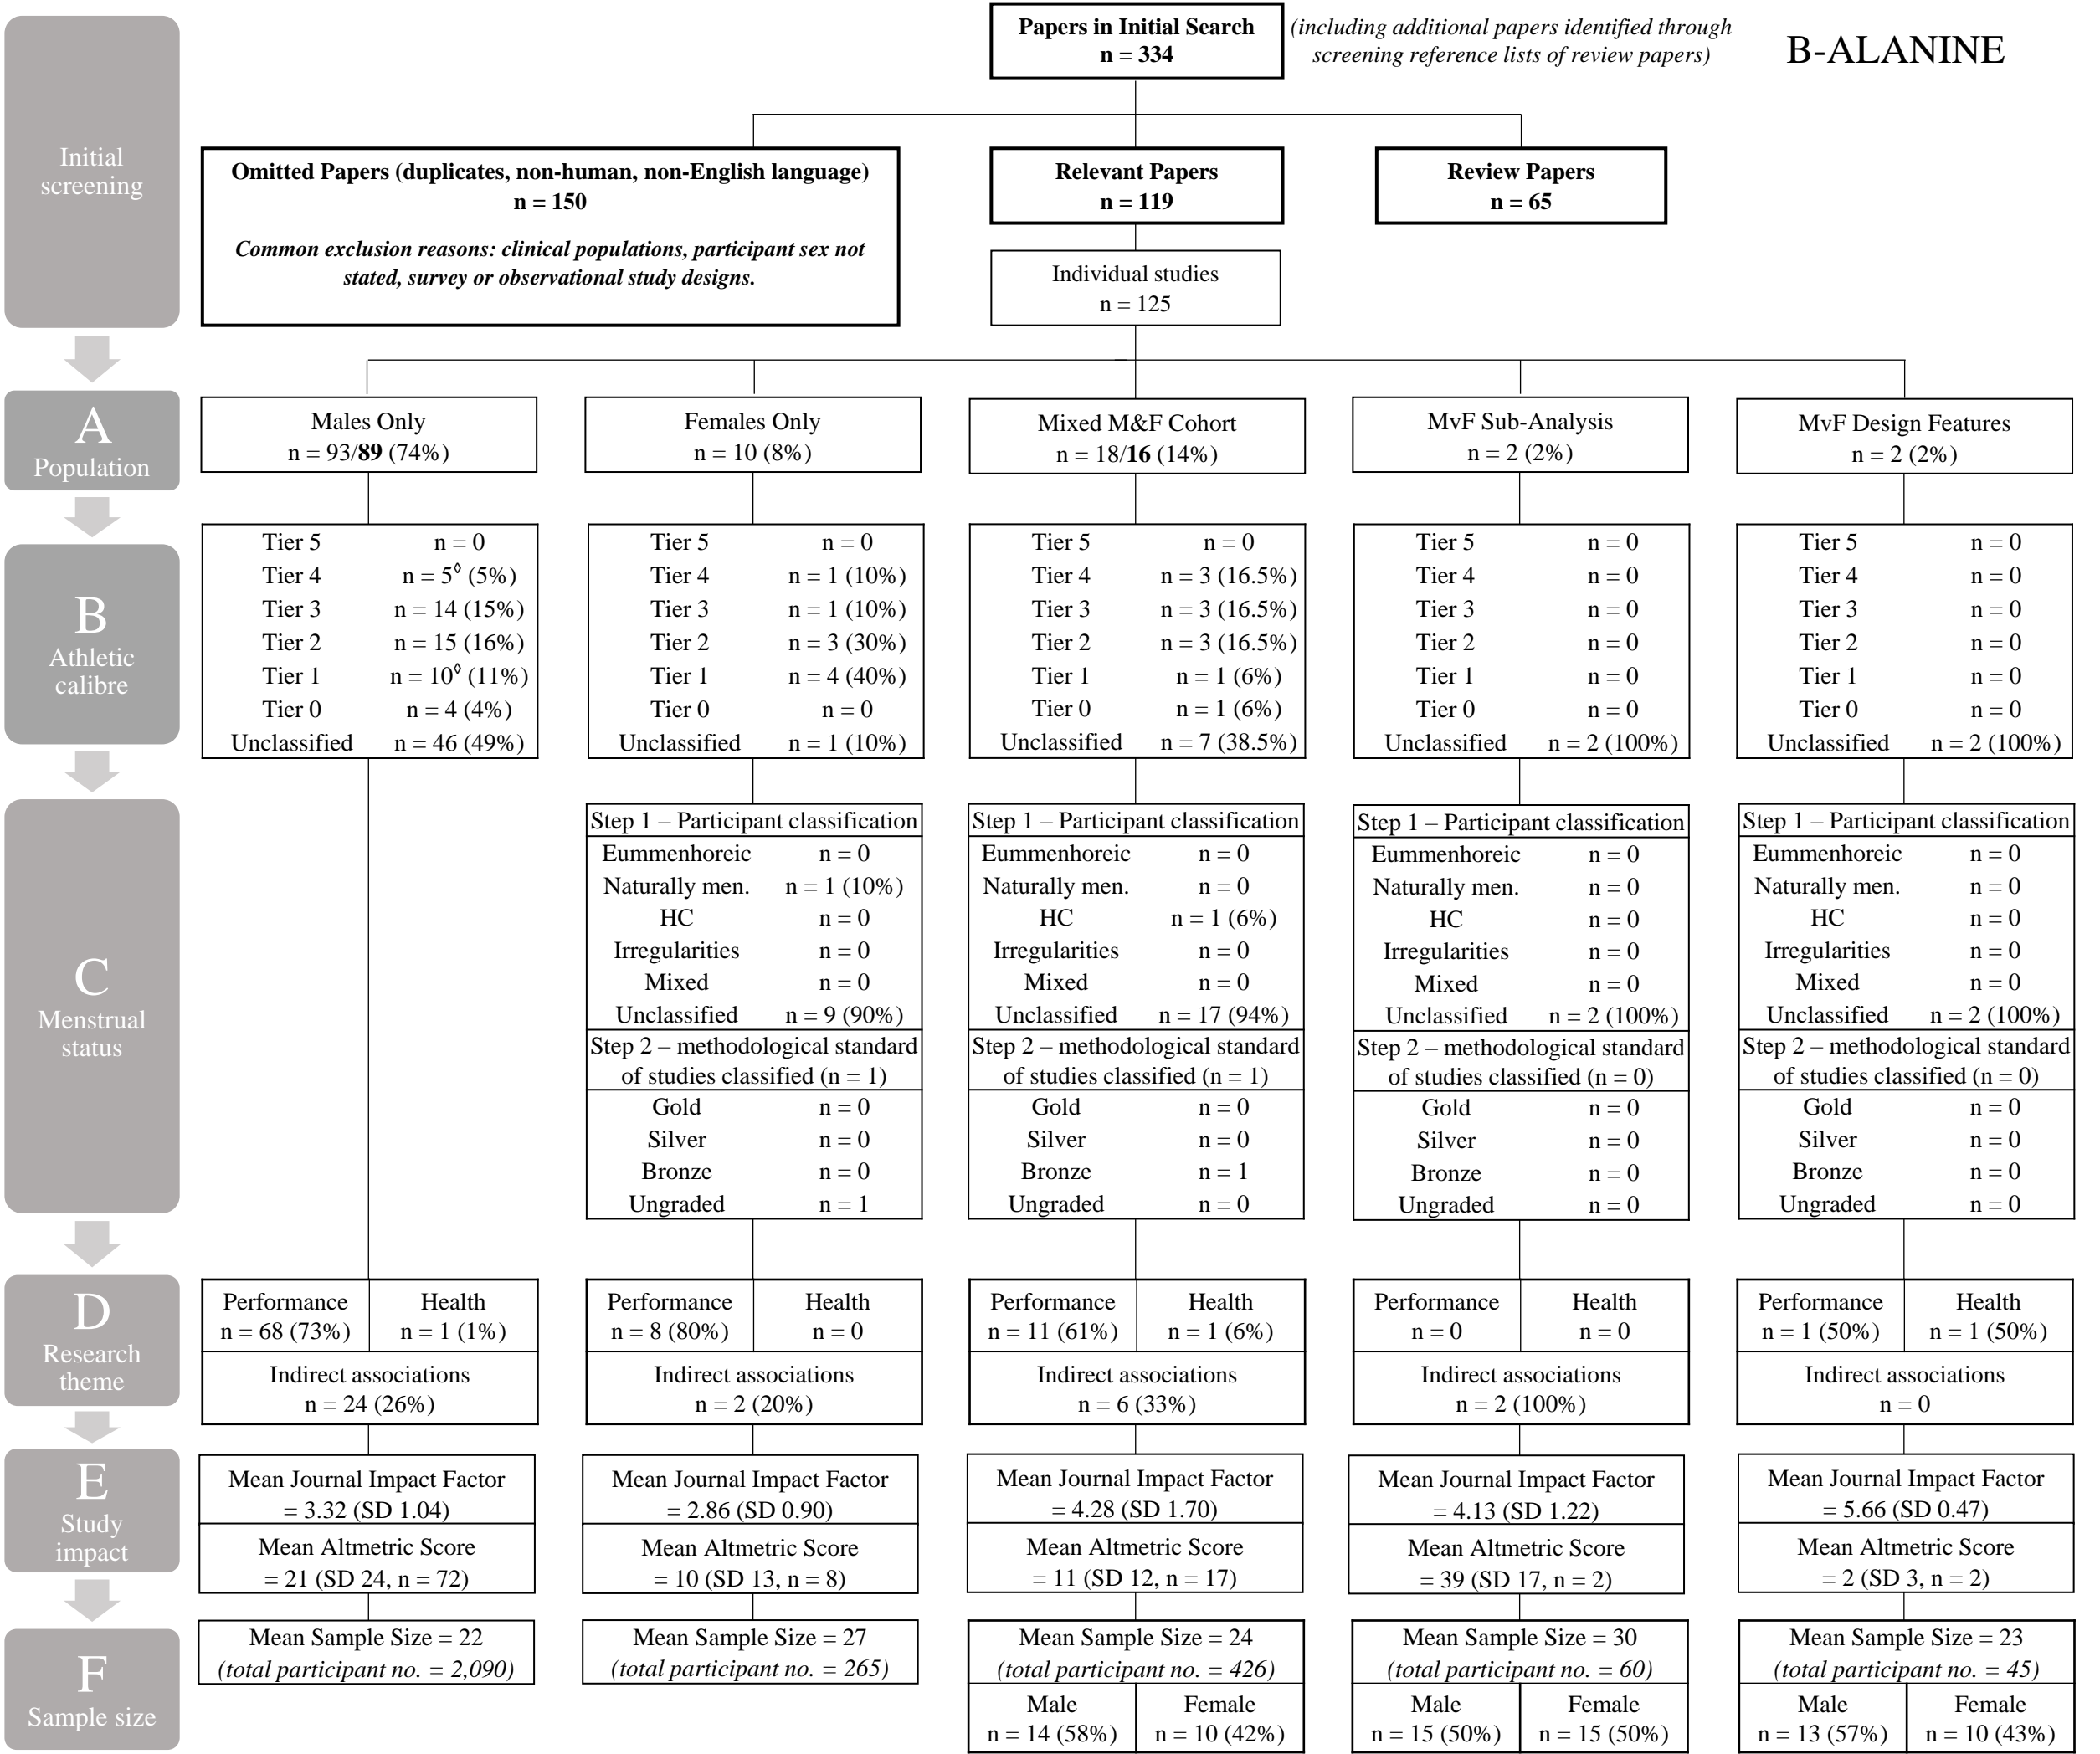

Supplement: s1 [file s1]
